# Supplementary material for: On polymorphism of 2-(4-fluorophenylamino)-5-(2,4-dihydroxybenzeno)-1,3,4-thiadiazole (FABT) DMSO solvates
Source: Royal Society of Chemistry journal article supplement (doi:10.1039/c3ce26778d), 2013-01-01
Supplement: c3ce26778d.pdf [file c3ce26778d.pdf]

## Supporting Materials

# On polymorphism of 2-(4-fluorophenylamino)- 5-(2,4-dihydroxybenzeno)-1,3,4-thiadiazole (FABT) DMSO Solvates

**Anna A. Hoser<sup>1§</sup>, Daniel M. Kamiński<sup>2§</sup>, Arkadiusz Matwiczuk<sup>3</sup>,  
Andrzej Niewiadomy<sup>2</sup>, Mariusz Gagoś<sup>3,4\*</sup>, Krzysztof Woźniak<sup>1\*</sup>**

<sup>1</sup>Department of Chemistry, University of Warsaw, 02-093 Warszawa, Pasteura 1, Poland.

<sup>2</sup>Department of Chemistry, University of Life Sciences in Lublin, Akademicka 15,  
20-950 Lublin, Poland.

<sup>3</sup>Department of Biophysics, University of Life Sciences in Lublin, Akademicka 13,  
20-950 Lublin, Poland.

<sup>4</sup>Department of Cell Biology, Institute of Biology and Biochemistry, Maria Curie-Skłodowska  
University, 20-033 Lublin, Poland.

\*Corresponding authors: Mariusz Gagoś (mariusz.gagos@up.lublin.pl)  
Krzysztof Woźniak (kwozniak@chem.uw.edu.pl)

§Both authors contributed equally to this work

**Hirshfeld surfaces.** We used fingerprint plots generated from Hirshfeld surfaces [47] to compare interactions between neighbouring molecules in investigated solvates. The following weighing function is used to define a Hirshfeld surface:

$$w_A(\mathbf{r}) = \frac{\sum_{i \in \text{molecule } A} \rho_i(\mathbf{r} - \mathbf{r}_i)}{\sum_{k \in \text{crystal}} \rho_k(\mathbf{r} - \mathbf{r}_k)},$$

where  $\rho_i$  is the spherically averaged atomic electron density of the  $i$ -th atom in the molecule (centred at point  $\mathbf{r}_i$ ) and  $\rho_k$  the electron density of  $k$ -th atom surrounding a particular molecule in the crystal. This weighing function defines the so-called Hirshfeld surface for molecule  $A$  when  $w_A(\mathbf{r}) = 0.5$  for every point  $\mathbf{r}$  at the surface. Within the Hirshfeld surface, the promolecule electron density dominates over the procrystal electron density. It is possible to map different properties on Hirshfeld surfaces: properties related to the shape of the surface (e.g. curvedness) and also those connected with distances:  $d_e$  – external distance from the Hirshfeld surface to an atom belonging to the closest molecules outside the surface,  $d_i$  – internal distance from the surface to an atom inside the surface and  $d_{\text{norm}}$ , which combines both  $d_e$  and  $d_i$ , each normalised by the van der Waals (vdW) radius for the particular atoms involved in the close proximity to the surface. When  $d_e$  and  $d_i$  are calculated for each point of the Hirshfeld surface, a 2D ( $d_e$  vs  $d_i$ ) a fingerprint plot can be created. The presented figures of Hirshfeld surface and fingerprint plots were prepared in CrystalExplorer program [48].

(a)

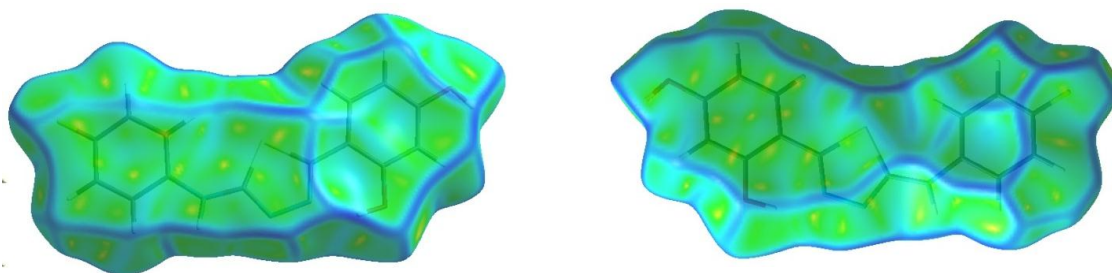

(b)

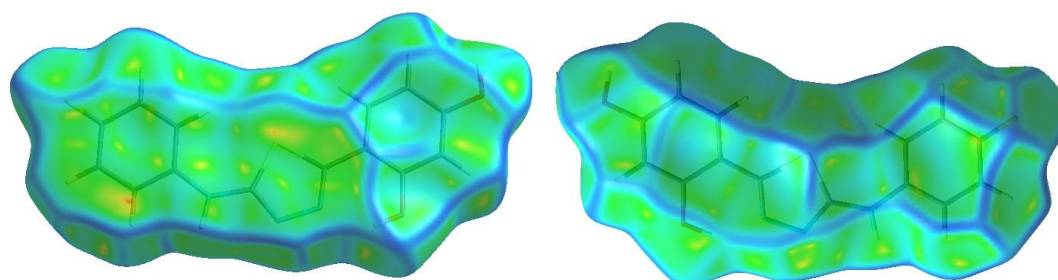

**Figure 1S.** Curvencness mapped on Hirshfeld surfaces for both sides of the (a) **FBxDM I** and (b) **FBxDM II** molecules.

**Table 1S.** Relative contributions of chosen intermolecular interactions to the Hirshfeld surface area for the **FABT** polymorphs.

| <b>Percentage contribution of particular interactions at the Hirshfeld surface</b> |               |                |                   |
|------------------------------------------------------------------------------------|---------------|----------------|-------------------|
|                                                                                    | <b>FABT I</b> | <b>FABT II</b> | <b>Difference</b> |
| F··H                                                                               | 8,7           | 9,7            | -1                |
| O··H                                                                               | 15,4          | 14,5           | 0,9               |
| N··H                                                                               | 10,7          | 11,4           | -0,7              |
| S··H                                                                               | 5,5           | 4              | 1,5               |
| C··H                                                                               | 12,7          | 21,6           | -8,9              |
| C··C                                                                               | 7             | 2,6            | 4,4               |
| H··H                                                                               | 30            | 25,5           | 4,5               |
| Other                                                                              | 10            | 10,7           | -0,7              |

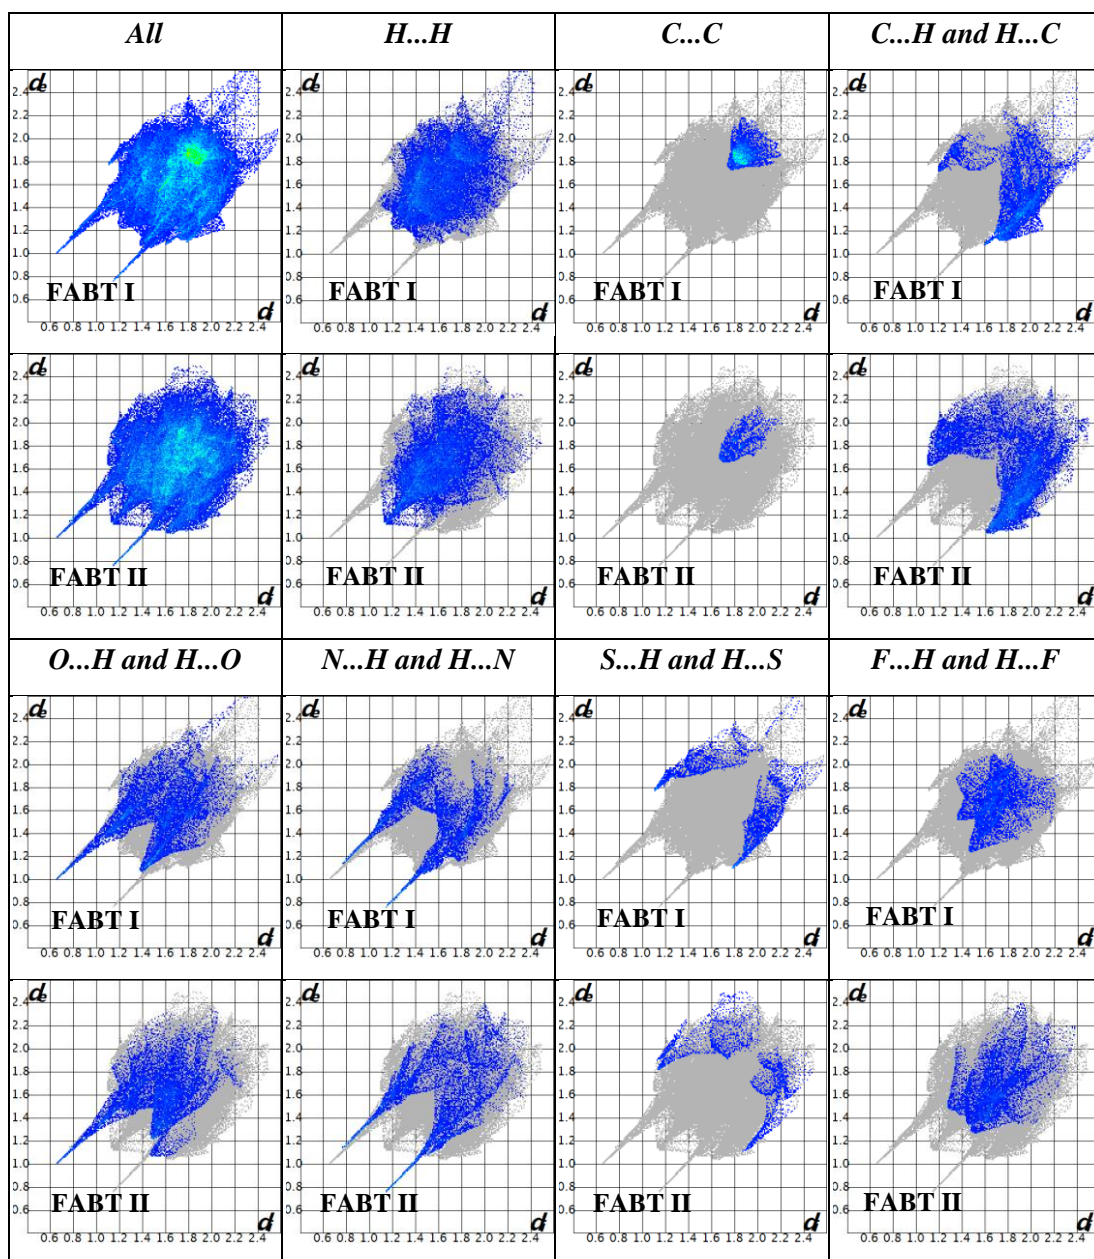

Figure 2S. Fingerprint plots and their breakdown into particular contributions.

**Table 2S.** Bond distances for **FABT** in the investigated polymorph structures of **FBxDM I** and **FBxDM II**.

| <b>Bond</b>    | <b>FBxDM I</b> | <b>FBxDM II</b> |
|----------------|----------------|-----------------|
| <b>S1-C7</b>   | 1.740(2)       | 1.732(5)        |
| <b>S1-C8</b>   | 1.750(2)       | 1.737(5)        |
| <b>S2-O1S</b>  | 1.511(2)       | 1.508(3)        |
| <b>S2-C2S</b>  | 1.769(3)       | 1.760(5)        |
| <b>S2-C1S</b>  | 1.771(3)       | 1.783(5)        |
| <b>F1-C1</b>   | 1.368(3)       | 1.363(5)        |
| <b>N3-C8</b>   | 1.307(3)       | 1.296(6)        |
| <b>N3-N2</b>   | 1.378(2)       | 1.376(5)        |
| <b>O2-C10</b>  | 1.365(3)       | 1.363(6)        |
| <b>O1-C12</b>  | 1.362(3)       | 1.355(5)        |
| <b>N2-C7</b>   | 1.314(3)       | 1.315(6)        |
| <b>N1-C7</b>   | 1.355(3)       | 1.352(6)        |
| <b>N1-C4</b>   | 1.401(3)       | 1.409(6)        |
| <b>C14-C13</b> | 1.381(3)       | 1.389(6)        |
| <b>C14-C9</b>  | 1.404(3)       | 1.379(7)        |
| <b>C8-C9</b>   | 1.457(3)       | 1.457(6)        |
| <b>C2-C3</b>   | 1.372(3)       | 1.369(7)        |
| <b>C2-C1</b>   | 1.373(3)       | 1.362(7)        |
| <b>C9-C10</b>  | 1.405(3)       | 1.399(7)        |
| <b>C5-C6</b>   | 1.386(3)       | 1.388(7)        |
| <b>C5-C4</b>   | 1.390(3)       | 1.371(7)        |
| <b>C10-C11</b> | 1.390(3)       | 1.383(6)        |
| <b>C12-C11</b> | 1.381(3)       | 1.371(7)        |
| <b>C12-C13</b> | 1.393(3)       | 1.399(7)        |
| <b>C4-C3</b>   | 1.403(3)       | 1.396(6)        |
| <b>C6-C1</b>   | 1.367(3)       | 1.372(7)        |

**Table 3S.** Valence angles in FABT molecules present in both polymorphs of FABT. Significant differences in red.

|            |            |            | <b>FBxDM I</b> | <b>FBxDM II</b> |
|------------|------------|------------|----------------|-----------------|
| <b>C7</b>  | <b>S1</b>  | <b>C8</b>  | 87.12(11)      | 87.1(2)         |
| <b>O1S</b> | <b>S2</b>  | <b>C2S</b> | 104.76(12)     | 104.9(2)        |
| <b>O1S</b> | <b>S2</b>  | <b>C1S</b> | 104.81(12)     | 105.3(2)        |
| <b>C2S</b> | <b>S2</b>  | <b>C1S</b> | 99.17(16)      | 98.0(2)         |
| <b>C8</b>  | <b>N3</b>  | <b>N2</b>  | 114.23(19)     | 115.0(4)        |
| <b>C7</b>  | <b>N2</b>  | <b>N3</b>  | 111.94(18)     | 110.7(4)        |
| <b>C7</b>  | <b>N1</b>  | <b>C4</b>  | 132.6(2)       | 131.6(4)        |
| <b>C13</b> | <b>C14</b> | <b>C9</b>  | 121.3(2)       | 121.7(5)        |
| <b>N3</b>  | <b>C8</b>  | <b>C9</b>  | 122.8(2)       | 123.2(4)        |
| <b>N3</b>  | <b>C8</b>  | <b>S1</b>  | 112.66(17)     | 112.7(3)        |
| <b>C9</b>  | <b>C8</b>  | <b>S1</b>  | 124.50(17)     | 124.2(4)        |
| <b>C3</b>  | <b>C2</b>  | <b>C1</b>  | 118.8(2)       | 119.1(5)        |
| <b>C14</b> | <b>C9</b>  | <b>C10</b> | 118.3(2)       | 118.5(4)        |
| <b>C14</b> | <b>C9</b>  | <b>C8</b>  | 121.8(2)       | 121.6(4)        |
| <b>C10</b> | <b>C9</b>  | <b>C8</b>  | 119.9(2)       | 120.0(4)        |
| <b>N2</b>  | <b>C7</b>  | <b>N1</b>  | 118.7(2)       | 118.7(4)        |
| <b>N2</b>  | <b>C7</b>  | <b>S1</b>  | 114.03(17)     | 114.5(3)        |
| <b>N1</b>  | <b>C7</b>  | <b>S1</b>  | 127.28(18)     | 126.8(4)        |
| <b>C6</b>  | <b>C5</b>  | <b>C4</b>  | 120.3(2)       | 120.3(4)        |
| <b>O2</b>  | <b>C10</b> | <b>C11</b> | 116.9(2)       | 116.8(4)        |
| <b>O2</b>  | <b>C10</b> | <b>C9</b>  | 122.8(2)       | 122.4(4)        |
| <b>C11</b> | <b>C10</b> | <b>C9</b>  | 120.3(2)       | 120.7(5)        |
| <b>O1</b>  | <b>C12</b> | <b>C11</b> | 121.9(2)       | 118.0(4)        |
| <b>O1</b>  | <b>C12</b> | <b>C13</b> | 117.6(2)       | 121.1(5)        |
| <b>C11</b> | <b>C12</b> | <b>C13</b> | 120.5(2)       | 120.9(4)        |
| <b>C12</b> | <b>C11</b> | <b>C10</b> | 120.2(2)       | 119.8(5)        |
| <b>C5</b>  | <b>C4</b>  | <b>N1</b>  | 125.4(2)       | 124.5(4)        |
| <b>C5</b>  | <b>C4</b>  | <b>C3</b>  | 119.0(2)       | 119.9(5)        |
| <b>N1</b>  | <b>C4</b>  | <b>C3</b>  | 115.6(2)       | 115.6(4)        |
| <b>C2</b>  | <b>C3</b>  | <b>C4</b>  | 120.6(2)       | 119.9(5)        |
| <b>C1</b>  | <b>C6</b>  | <b>C5</b>  | 119.0(2)       | 118.1(5)        |
| <b>C14</b> | <b>C13</b> | <b>C12</b> | 119.4(2)       | 118.4(5)        |
| <b>C6</b>  | <b>C1</b>  | <b>F1</b>  | 118.7(2)       | 118.0(5)        |
| <b>C6</b>  | <b>C1</b>  | <b>C2</b>  | 122.4(2)       | 122.6(5)        |
| <b>F1</b>  | <b>C1</b>  | <b>C2</b>  | 118.9(2)       | 119.4(4)        |

**Table 4S.** Details of hydrogen bonding and other strongest intermolecular interactions in **FBxDM I** and **FBxDM II** crystal lattices.

| D-H...A              | Symm          | d(D-H) / Å | d(H...A) / Å | d(D...A) / Å | <DHA / ° |
|----------------------|---------------|------------|--------------|--------------|----------|
| <b>FBxDM I</b>       |               |            |              |              |          |
| N1-H1N...N2          | -x, -y, -z+2  | 0.79(2)    | 2.13(2)      | 2.921(3)     | 171(2)   |
| O2-H2O...N3          | x,y,z         | 0.75(3)    | 1.93(3)      | 2.622(3)     | 153(3)   |
| O1-H1O...O1S         | x-1, y-1,z-1  | 0.90(3)    | 1.75(3)      | 2.644(3)     | 174(3)   |
| Weak hydrogen bonds: |               |            |              |              |          |
| C3-H3... N3          | -x, -y, -z+2  | 0.95       | 2.65         | 3.520(3)     | 153      |
| C6-H6...O1           | 1-x, -y, 1-z  | 0.95       | 2.55         | 3.254(3)     | 131      |
| C14-H14...O2         | 1+x, y, z     | 0.95       | 2.63         | 3.411(3)     | 140      |
| C1S-H11S...O2        | -x, -y, -z+2  | 0.98       | 2.66         | 3.546(3)     | 150      |
| <b>FBxDM II</b>      |               |            |              |              |          |
| N1-H1N...N2          | 2-x, 2-y, -z  | 0.86(5)    | 2.06(5)      | 2.918(6)     | 171(4)   |
| O2-H2O...N3          | x, y, z       | 0.86(5)    | 1.92(6)      | 2.601(5)     | 135(5)   |
| O1-H1O...O1S         | x, y, z       | 0.92(7)    | 1.74(7)      | 2.647(5)     | 168(6)   |
| Weak hydrogen bonds: |               |            |              |              |          |
| C1S-H13S...O2        | 2-x, 1-y, 1-z | 0.98       | 2.67         | 3.627(6)     | 166      |
| C1S-H13S...C10       | 2-x, 1-y, 1-z | 0.98       | 2.84         | 3.738(6)     | 152      |
| C3-H3...N3           | 2-x, 2-y, -z  | 0.95       | 2.72         | 3.599(6)     | 154      |
